# Supplementary material for: Hierarchical multicarbonyl polyimide architectures as promising anode active materials for high-performance lithium/sodium ion batteries
Source: Royal Society of Chemistry journal article supplement (doi:10.1039/c9ta05552e), 2019-01-01
Supplement: c9ta05552e1.pdf [file c9ta05552e1.pdf]

Supporting Information

## **Hierarchical Multicarbonyl Polyimide Architectures as Promising Anode Active Materials for High-Performance Lithium/Sodium Ion Batteries**

Jun Li<sup>#a</sup>, Mo Luo<sup>#b</sup>, Zhaohu Ba<sup>a</sup>, Zhenxing Wang<sup>a</sup>, Lijuan Chen<sup>a</sup>, Yingzhi Li<sup>c</sup>, Mengmeng Li<sup>a</sup>, Hai-Bei Li<sup>b</sup>, Jie Dong<sup>a</sup>, Xin Zhao<sup>a\*</sup> and Qinghua Zhang<sup>a\*</sup>

a. State Key Laboratory for Modification of Chemical Fibers and Polymer Materials, College of Materials Science and Engineering, Donghua University, Shanghai 201620, PR China

b. School of Ocean, Shandong University, Weihai 264209, PR China

c. Southern University Science and Technology, Department of Materials Science and Engineering, Shenzhen 518055, PR China

Corresponding author: [xzhao@dhu.edu.cn](mailto:xzhao@dhu.edu.cn), [qhzhang@dhu.edu.cn](mailto:qhzhang@dhu.edu.cn)

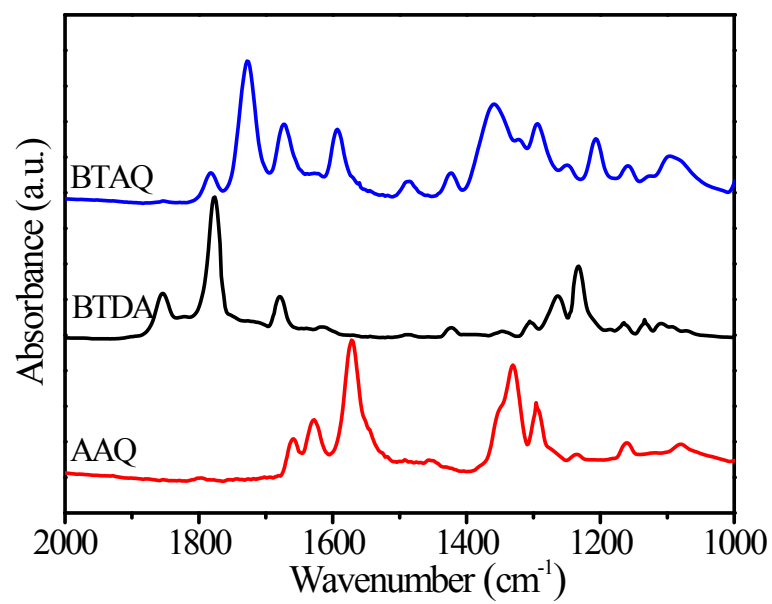

**Figure S1.** FTIR spectra of BTAQ with each monomer.

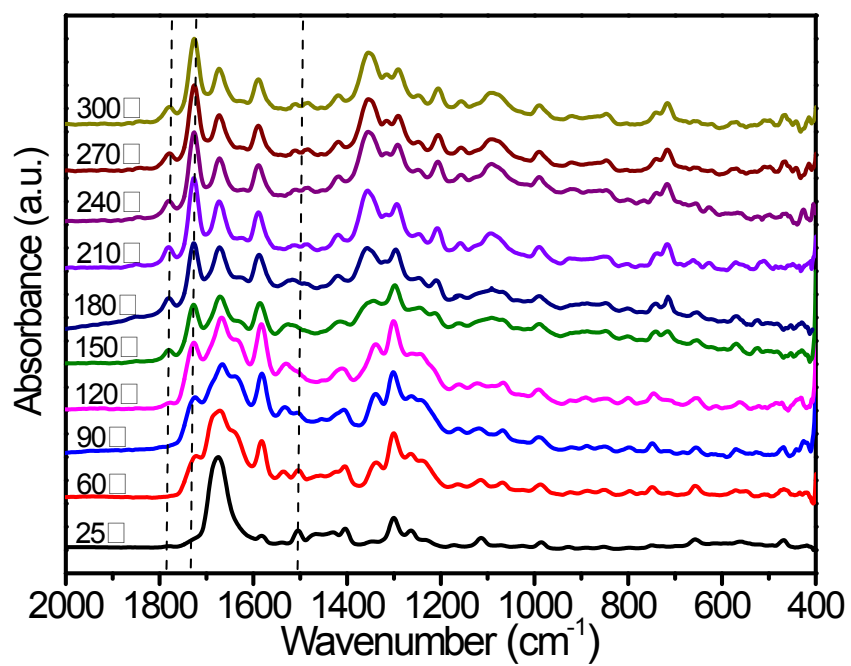

**Figure S2.** Temperature-programmed infrared spectroscopy of BTAQ

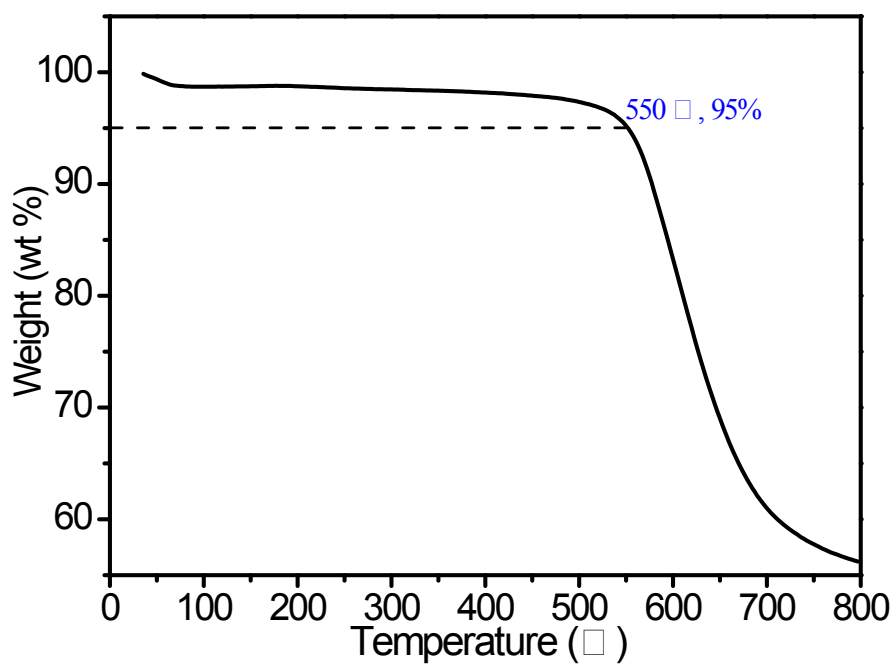

**Figure S3.** The TGA curves of BTAQ

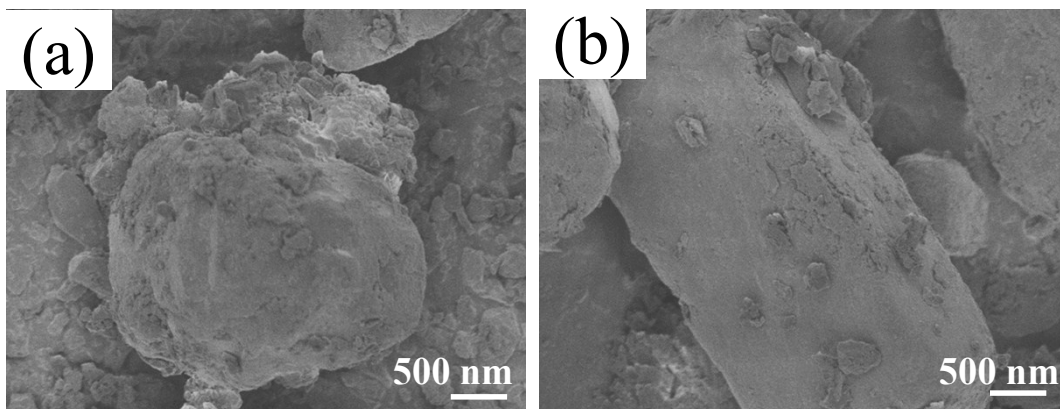

**Figure S4.** SEM image of (a) BTDA and (b) DAAQ

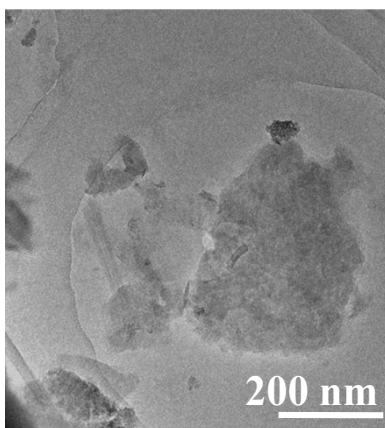

**Figure S5.** TEM image of BTAQ after sonication in ethanol.

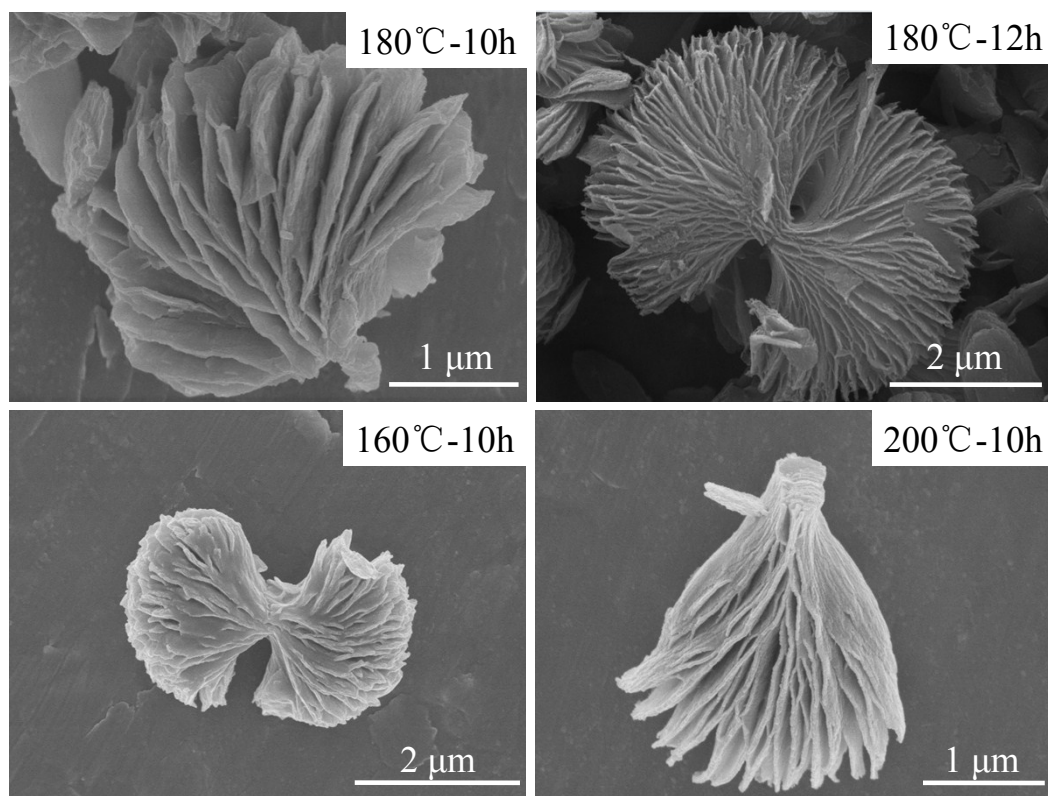

**Figure S6.** SEM images of different samples obtained with various reaction conditions

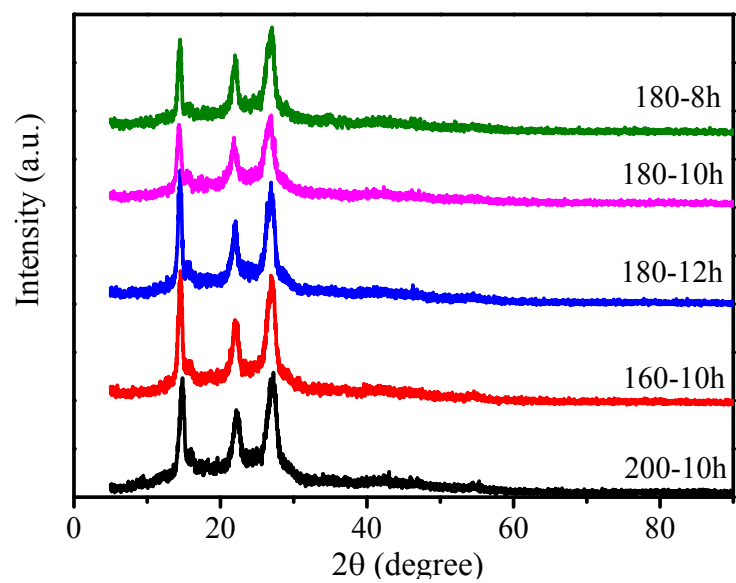

**Figure S7.** XRD curves of the products obtained with different reaction conditions



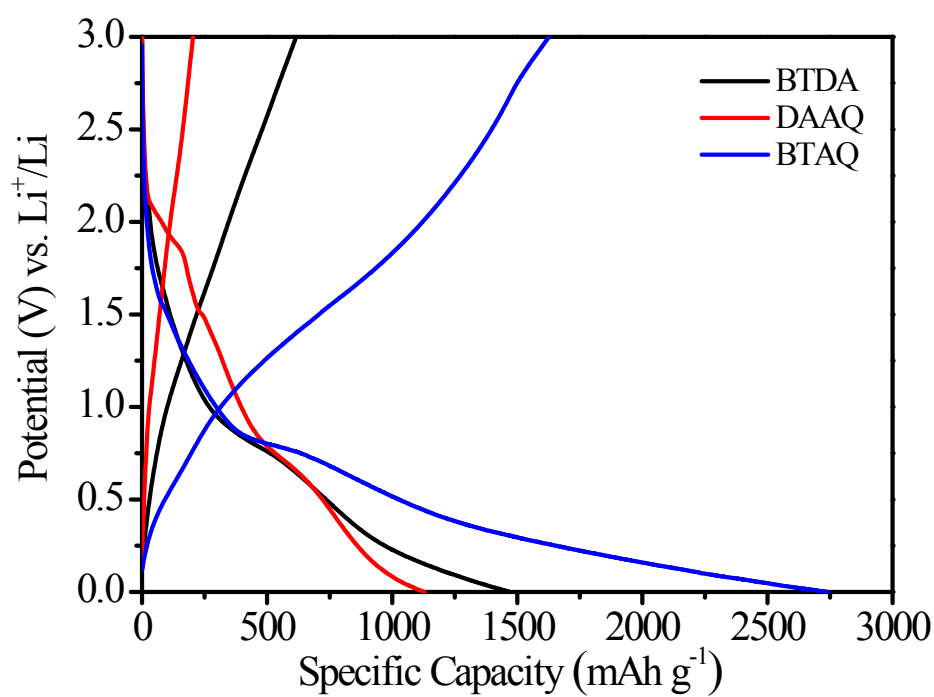

**Figure S8.** Charge-discharge profiles of monomers and BTAQ at the initial cycle a current density of  $0.1 \text{ A g}^{-1}$

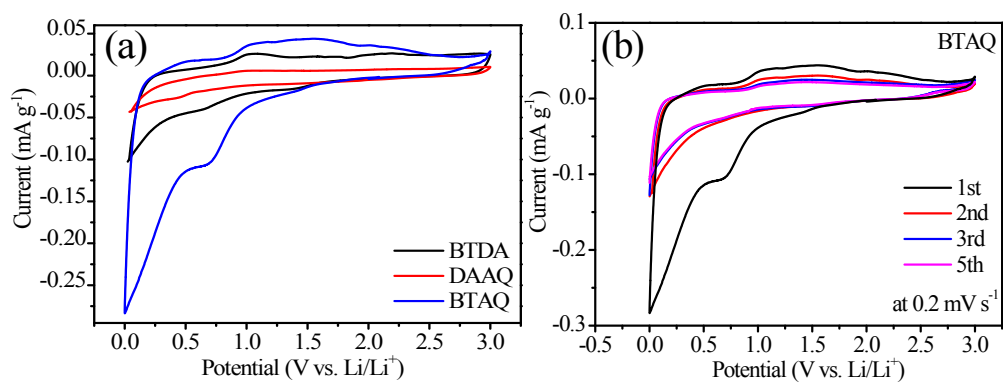

**Figure S9.** (a) The CV profiles of each monomer and BTAQ, (b) the CV curves of BTAQ at the first five cycles with a scan rate of  $0.2 \text{ mV s}^{-1}$ .

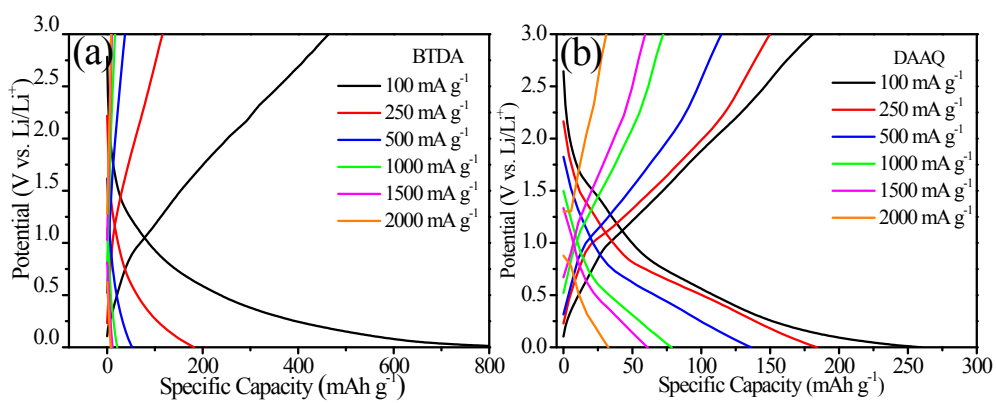

**Figure S10.** The charge-discharge curves of (a) BTDA and (b) DAAQ at various current densities.

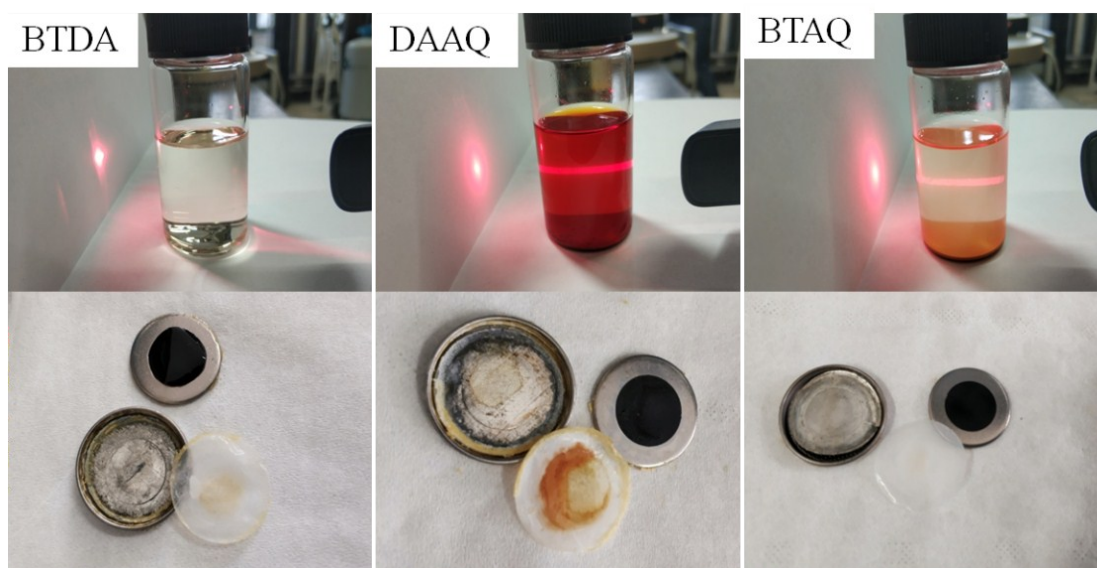

**Figure S11.** The dissolution properties of BTDA, DAAQ and BTAQ after cycling in electrolyte and the appearance of separator after cycling test.

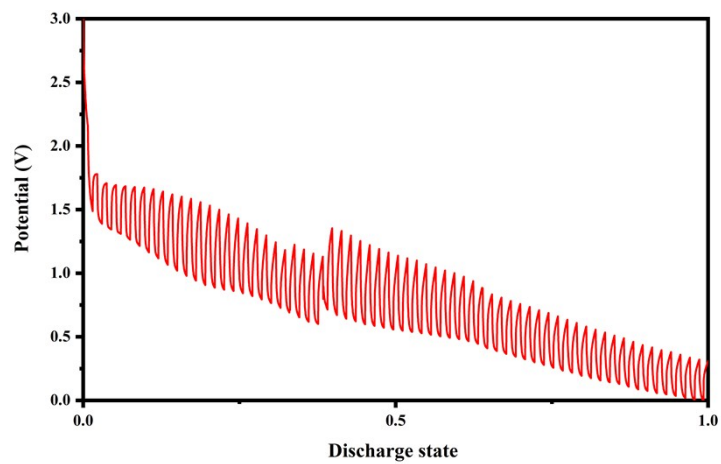

**Figure S12.** The GITT curves for BTAQ electrode

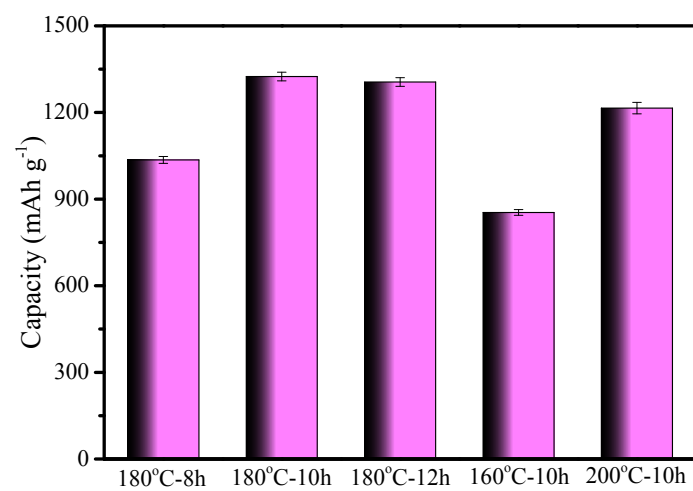

**Figure S13.** The average specific discharge capacities of BTAQ by various reaction conditions

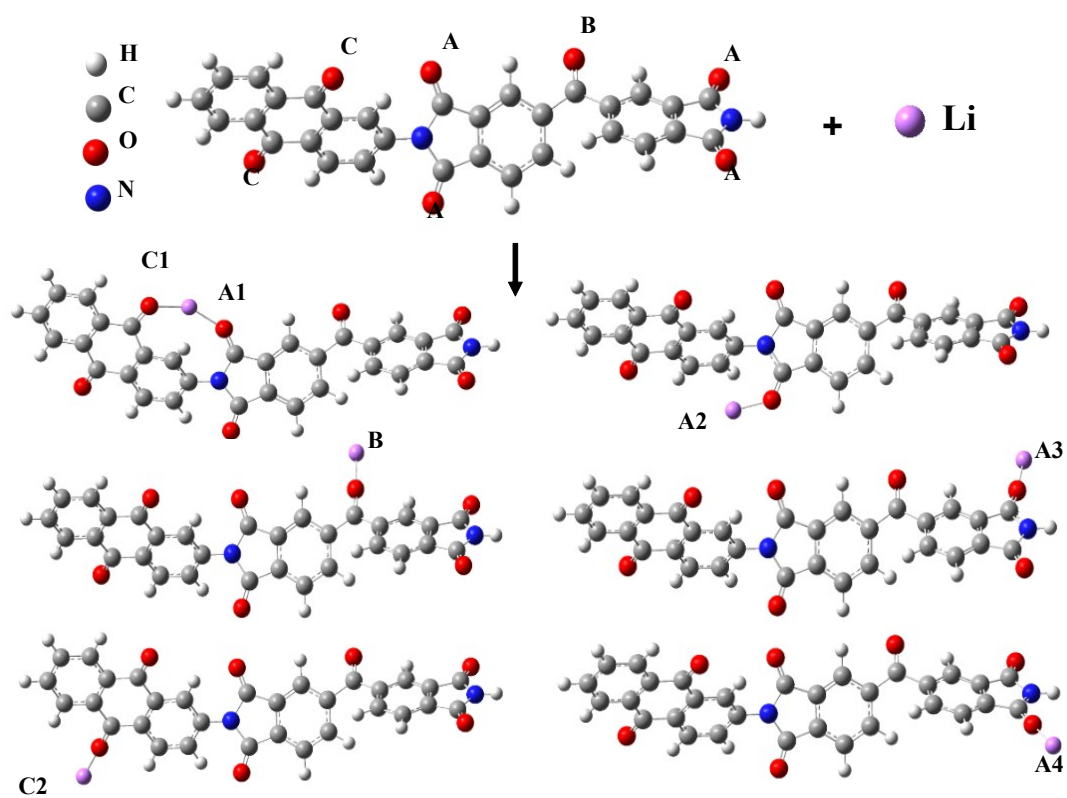

**Figure S14.** The diagrams of simulated combination for different active sites with Li species.

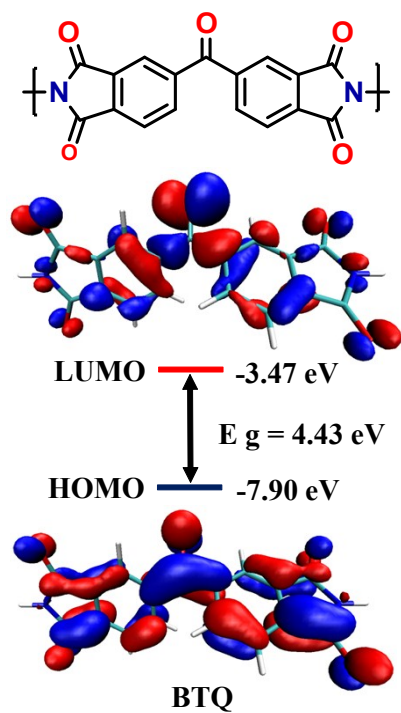

**Figure S15.** Energy level diagram for structure of BTQ obtained from DFT calculations.



**Table S1.** Elemental analysis of BTAQ and each monomer

|      | Calculated values % |      |       |       |      | Theoretical values % |      |       |       |      |
|------|---------------------|------|-------|-------|------|----------------------|------|-------|-------|------|
|      | C                   | H    | O     | N     | N:O  | C                    | H    | O     | N     | N:O  |
| BTDA | 62.95               | 1.9  | 35.15 | —     | —    | 63.31                | 1.86 | 34.78 | —     | —    |
| DAAQ | 70.17               | 4.13 | 13.98 | 11.72 | 0.84 | 70.59                | 4.2  | 13.15 | 11.76 | 0.89 |
| BTAQ | 69.56               | 2.43 | 22.66 | 5.35  | 0.24 | 70.99                | 2.29 | 21.37 | 5.34  | 0.25 |

**Table S2.** Comparison with the reported results of organic anode materials for LIBs

| Anode materials                        | Specific capacity (mAh g <sup>-1</sup> ) | Capacity after cycling test (mAh g <sup>-1</sup> ) | Number of cycles | Refs                                                               |
|----------------------------------------|------------------------------------------|----------------------------------------------------|------------------|--------------------------------------------------------------------|
| BTQ                                    | 1001@42 mA g <sup>-1</sup>               | 829@42 mA g <sup>-1</sup>                          | 50               | <i>Small</i> <b>2018</b> , <i>14</i> , 1704094                     |
| BLL                                    | 662@192.6 mA g <sup>-1</sup>             | 619@100 mA g <sup>-1</sup> (RT)                    | 50               | <i>Adv. Energy Mater.</i> <b>2015</b> , <i>5</i> , 1402189         |
|                                        | 1416@192.6 mA g <sup>-1</sup>            | 1181 @100 mA g <sup>-1</sup> (50°C)                |                  |                                                                    |
| CIN-1/CNT                              | -                                        | 292@100 mA g <sup>-1</sup>                         | 250              | <i>Adv. Energy Mater.</i> <b>2019</b> , <i>9</i> , 1801010         |
| SNW-1/CNT                              | -                                        | 306@100 mA g <sup>-1</sup>                         |                  |                                                                    |
| ECIN-1/CNT                             | 1269@100 mA g <sup>-1</sup>              | 749@100 mA g <sup>-1</sup>                         |                  |                                                                    |
| ESNW-1/CNT                             | 1470@100 mA g <sup>-1</sup>              | 693@100mA g <sup>-1</sup>                          |                  |                                                                    |
| PAT-COF                                | 1305@100mA g <sup>-1</sup>               | 1770@200mA g <sup>-1</sup>                         | 400              | <i>ACS Appl. Mater. Interfaces</i> <b>2018</b> , <i>10</i> , 37023 |
| Benzenetricarboxaldehyde-based COF@CNT | 928@100 mA g <sup>-1</sup>               | 1032@100 mA g <sup>-1</sup>                        | 500              | <i>Nat. Comm.</i> , <b>2018</b> , <i>9</i> , 576                   |
| PSB                                    | 315@10 mA g <sup>-1</sup>                | 160@10 mA g <sup>-1</sup>                          | 100              | <i>Electrochim. Acta</i> , <b>2017</b> , <i>253</i> , 319          |
| PIAQ                                   | 1130@200 mA g <sup>-1</sup>              | 1097@200 mA g <sup>-1</sup>                        | 100              | <i>J. Mater. Chem. A</i> , <b>2019</b> , <i>7</i> , 2368           |
| PI                                     | 192@100 mA g <sup>-1</sup>               | 176@100 mA g <sup>-1</sup>                         | 100              | <i>J. Mater. Chem. A</i> , <b>2018</b> , <i>6</i> , 21216          |
| PI-MG                                  | 783@100 mA g <sup>-1</sup>               | 612@100 mA g <sup>-1</sup>                         |                  |                                                                    |
| <b>BTAQ</b>                            | <b>1343.8@100 mA g<sup>-1</sup></b>      | <b>665.1@250 mA g<sup>-1</sup></b>                 | <b>50</b>        | <b>This work</b>                                                   |

**Table S3.** Comparison with the reported results of anode materials for SIBs

| Anode materials             | Specific capacity (mAh g <sup>-1</sup> )                | Capacity after cycling test (mAh g <sup>-1</sup> ) | Number of cycles | Ref                                               |
|-----------------------------|---------------------------------------------------------|----------------------------------------------------|------------------|---------------------------------------------------|
| TAPB-terephthalaldehyde COF | 303@100 mA g <sup>-1</sup>                              | 300@100 mA g <sup>-1</sup>                         | 1000             | <i>Electrochim. Acta</i> , <b>2019</b> , 301, 23  |
| PMDA-MA COF                 | 1312@100 mA g <sup>-1</sup><br>137@10 A g <sup>-1</sup> | 130@ 10 A g <sup>-1</sup>                          | 1000             | <i>ACS Nano</i> , <b>2019</b> , 13, 2473          |
| Carbon/graphene composite   | 170@500 mA g <sup>-1</sup>                              | 142@500 mA g <sup>-1</sup>                         | 2500             | <i>Nano Energy</i> , <b>2015</b> , 12, 224        |
| Hollow carbon nanospheres   | 171@500 mA g <sup>-1</sup>                              | 160@100 mA g <sup>-1</sup>                         | 100              | <i>Adv. Energy Mater.</i> , <b>2012</b> , 2, 873  |
| Carbon nanofibres           | 296@500 mA g <sup>-1</sup>                              | 243@50 mA g <sup>-1</sup>                          | 100              | <i>Nanoscale</i> , <b>2014</b> , 6, 1384          |
| PMDA-PDA                    | 124@50 mA g <sup>-1</sup>                               | 125@24 mA g <sup>-1</sup>                          | 100              | <i>Electrochim. Acta</i> , <b>2018</b> , 265, 702 |
| <b>BTAQ</b>                 | <b>275.8@25 mA g<sup>-1</sup></b>                       | <b>130@25 mA g<sup>-1</sup></b>                    | <b>100</b>       | <b>This work</b>                                  |
